# Supplementary material
Source: PubMed Central journal article supplement (PMC2746443)
Supplement: NIHMS127985-supplement-2.pdf [file NIHMS127985-supplement-2.pdf]

## Supplemental Data

### ERAAP Synergizes with MHC Class I Molecules

### to Make the Final Cut in the Antigenic Peptide

### Precursors in the Endoplasmic Reticulum

Takayuki Kanaseki, Nicolas Blanchard, Gianna Elena Hammer, Federico Gonzalez, and Nilabh Shastri

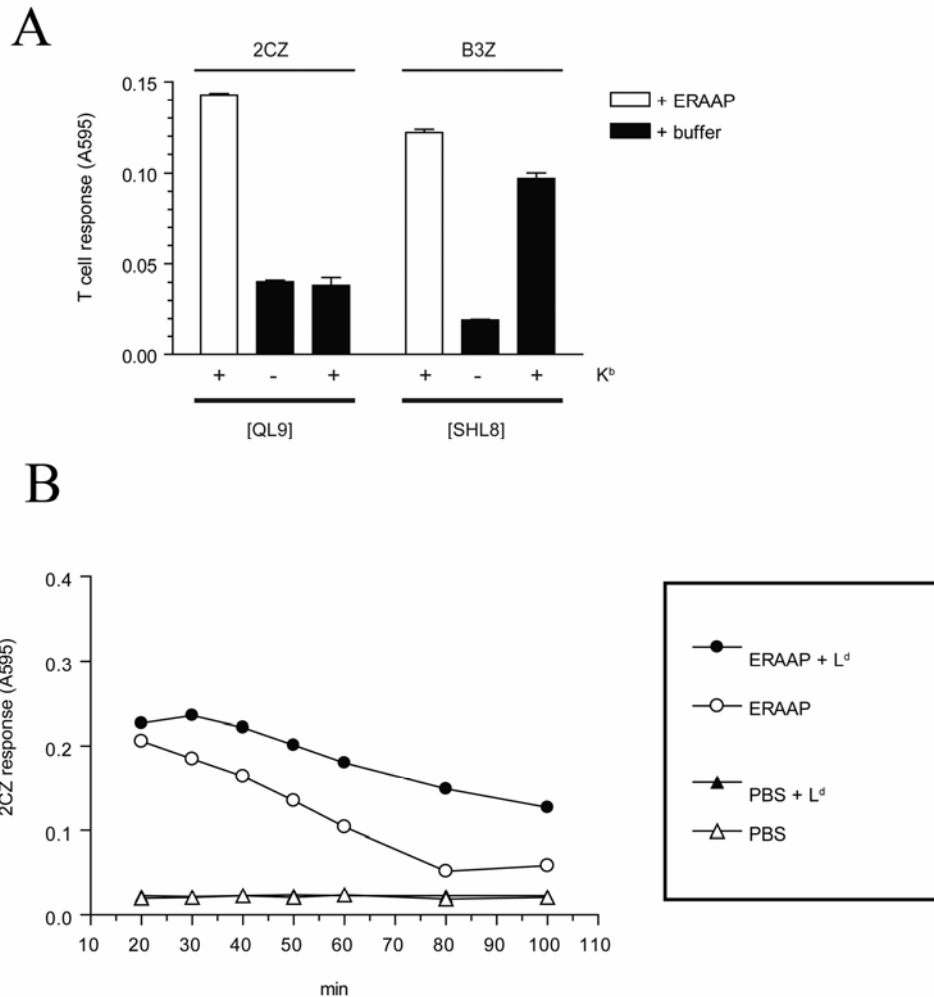

Figure S1. The Degradation of the Peptides by Recombinant ERAAP and Peptide-Specific Protection by MHC I

(A) Recombinant ERAAP trims both QL9 and SHL8 synthetic peptides, and K<sup>b</sup> MHC protects SHL8 but not QL9 from degradation. Synthetic QL9 or SHL8 peptides were incubated with or without rERAAP, in the presence or absence of K<sup>b</sup>-Ig fusion protein. The remaining QL9 or SHL8 peptides were measured by 2CZ or B3Z responses respectively in the presence of appropriate APCs.

(B) Kinetics of trimming the N-terminally extended X7[QL9] synthetic peptide. Recombinant L<sup>d</sup> delays the peptide degradation by rERAAP. The X7[QL9] peptide was incubated with or without rERAAP, in the presence or absence of L<sup>d</sup>-Ig fusion protein. Each reaction was stopped by adding acetic acid at indicated time points, and remaining QL9 peptides were detected in a T cell assay in the presence of APCs expressing L<sup>d</sup>.

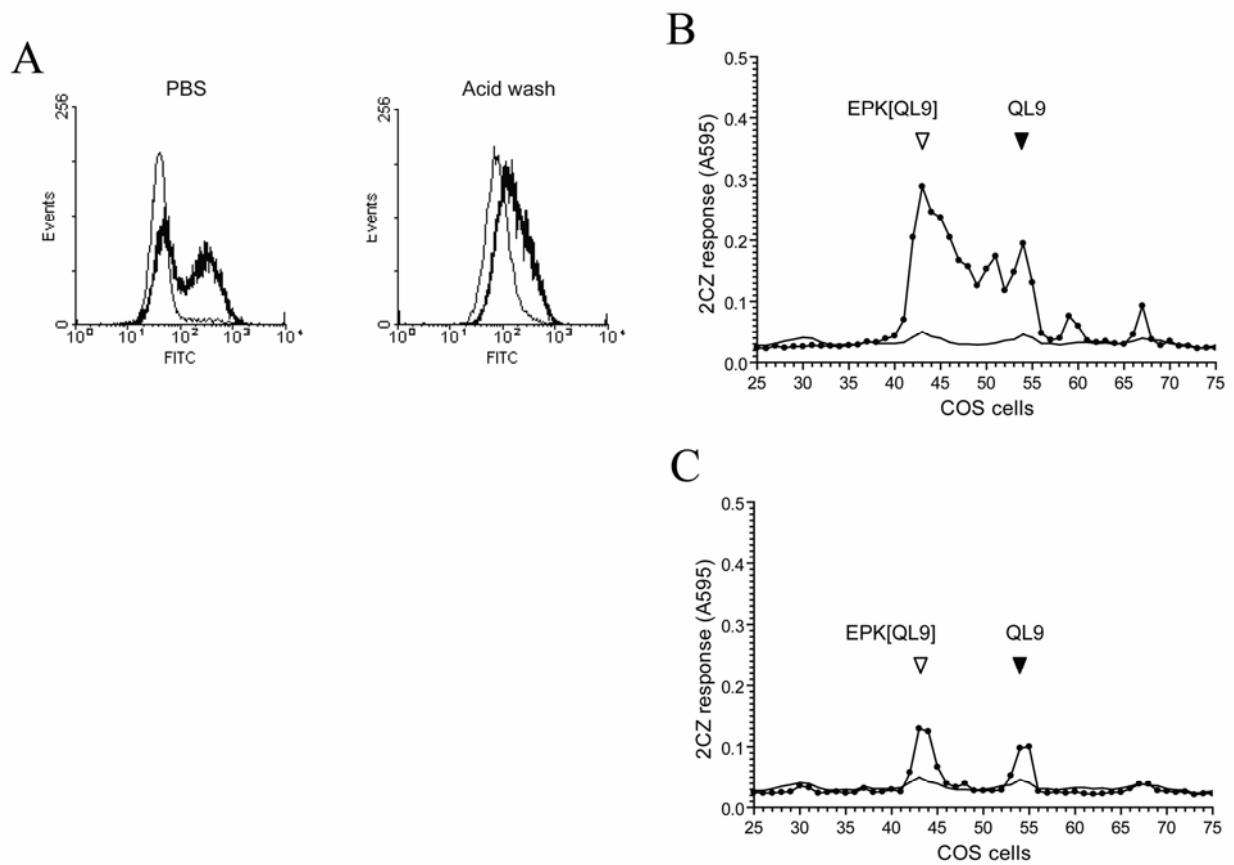

Figure S2. Intracellular L<sup>d</sup> Is Bound to the Extended EPK[QL9] Peptide

The COS cells were transfected with ES-X3-EPK[QL9], L<sup>d</sup> and ICP47. After two days the cells were treated with mild-acid and washed extensively before peptide extraction. Cell extraction, RP-HPLC and immunoprecipitation procedures were identical to those for Fig 7. (a) After the acid-wash the cells lost most of the L<sup>d</sup> MHC from the cell surface as indicated by L<sup>d</sup> staining by 28.14.8 monoclonal antibody. However, comparable profiles of peptides were found in (b) the total cell extract fractionated by RP-HPLC, as well as in (c) anti L<sup>d</sup> (28.14.8) immunoprecipitate. All fractions were treated with trypsin before the T cell assay.
